# Supplementary material
Source: publisher figshare collection journal article supplement (https://geolsoc.figshare.com/ndownloader/files/5423078)
Supplement: Supplementary file 1 [file 5423078]

	ISOTOPIC RATIOS							AGES Ma
Analysis	207Pb/235U	1s abs	206Pb/238U	1s abs	Rho	207Pb/206Pb	1s abs	207Pb/235U	1s abs	206Pb/238U	1s abs	207Pb/206Pb	1s abs	concordia	1s abs	MSWD	probab. conc.
#1	0.3793	0.0252	0.0518	0.0030	0.43	0.0531	0.0022	327	19	326	18	332	93	326	16	0.01	0.935
#2	0.3852	0.0202	0.0534	0.0025	0.44	0.0523	0.0022	331	15	335	15	299	98	333	13	0.34	0.561
#3	0.4614	0.0437	0.0548	0.0020	0.19	0.0611	0.0040	385	30	344	12	641	141	347	12	7.09	0.008
#4	0.4292	0.0282	0.0550	0.0027	0.37	0.0566	0.0038	363	20	345	16	474	147	351	15	2.76	0.097
#5	0.3658	0.0202	0.0517	0.0016	0.28	0.0514	0.0022	316	15	325	10	257	100	323	9	1.12	0.291
#6	0.3857	0.0198	0.0531	0.0025	0.45	0.0527	0.0019	331	14	334	15	314	80	332	13	0.10	0.753
#7	0.4031	0.0226	0.0537	0.0022	0.36	0.0544	0.0030	344	16	337	13	388	123	340	12	0.59	0.442
#8	0.4354	0.0199	0.0584	0.0022	0.42	0.0541	0.0017	367	14	366	14	375	70	366	12	0.03	0.860
#9	0.4228	0.0254	0.0588	0.0016	0.23	0.0522	0.0027	358	18	368	10	293	118	367	9	1.22	0.270
#10	0.4226	0.0280	0.0613	0.0017	0.21	0.0500	0.0030	358	20	384	10	195	138	380	10	6.37	0.012
#11	0.3951	0.0218	0.0550	0.0023	0.38	0.0521	0.0016	338	16	345	14	289	72	342	12	0.73	0.392
#12	0.3965	0.0198	0.0545	0.0018	0.34	0.0528	0.0018	339	14	342	11	320	75	341	10	0.14	0.706
#13	0.4323	0.0372	0.0605	0.0030	0.29	0.0518	0.0048	365	26	379	18	278	213	375	17	1.03	0.311
#14	0.4051	0.0298	0.0536	0.0020	0.25	0.0548	0.0032	345	22	336	12	406	129	338	11	0.66	0.418
#15	0.4066	0.0277	0.0570	0.0025	0.33	0.0518	0.0019	346	20	357	15	276	85	354	14	1.05	0.306
#16	0.4044	0.0267	0.0561	0.0018	0.25	0.0523	0.0028	345	19	352	11	297	124	351	11	0.53	0.468
#17	0.4013	0.0251	0.0559	0.0021	0.29	0.0521	0.0025	343	18	351	13	288	110	349	12	0.75	0.387
#18	0.4097	0.0189	0.0548	0.0019	0.37	0.0542	0.0028	349	14	344	11	380	115	346	10	0.45	0.502
#19	0.4718	0.0364	0.0625	0.0025	0.26	0.0548	0.0041	392	25	391	15	402	167	391	14	0.02	0.898
#20	0.3841	0.0202	0.0510	0.0018	0.34	0.0546	0.0023	330	15	321	11	394	93	324	10	1.41	0.235
#21	0.3794	0.0236	0.0517	0.0023	0.35	0.0532	0.0017	327	17	325	14	337	74	326	13	0.02	0.877
#22	0.4012	0.0278	0.0559	0.0023	0.29	0.0521	0.0025	343	20	351	14	289	109	348	13	0.59	0.442
#23	0.4076	0.0219	0.0518	0.0028	0.51	0.0570	0.0017	347	16	326	17	493	64	338	14	6.69	0.010
#24	0.3997	0.0168	0.0526	0.0009	0.20	0.0551	0.0020	341	12	331	5	415	80	332	5	3.03	0.082
#25	0.4307	0.0255	0.0542	0.0023	0.35	0.0576	0.0035	364	18	340	14	516	134	347	13	6.41	0.011
#26	0.3872	0.0172	0.0540	0.0011	0.22	0.0520	0.0022	332	13	339	7	285	96	338	6	1.11	0.291
#27	0.4223	0.0322	0.0551	0.0027	0.32	0.0555	0.0040	358	23	346	16	434	161	349	15	0.98	0.323
#28	0.4064	0.0181	0.0537	0.0014	0.30	0.0549	0.0019	346	13	337	9	409	76	339	8	1.89	0.169
#29	0.4266	0.0237	0.0546	0.0020	0.33	0.0566	0.0024	361	17	343	12	478	95	347	11	4.29	0.038
#30	0.4111	0.0280	0.0546	0.0029	0.39	0.0546	0.0024	350	20	343	18	397	100	345	16	0.46	0.497
#31	0.3856	0.0213	0.0514	0.0025	0.44	0.0544	0.0020	331	16	323	15	388	81	327	13	0.98	0.323
#32	0.4197	0.0217	0.0531	0.0023	0.43	0.0573	0.0022	356	16	333	14	505	83	343	13	7.81	0.005
#33	0.4223	0.0172	0.0547	0.0019	0.43	0.0559	0.0019	358	12	344	12	450	76	350	10	4.80	0.028
#34	0.4140	0.0198	0.0546	0.0014	0.27	0.0550	0.0025	352	14	343	9	411	102	345	8	1.50	0.220
#35	0.4330	0.0212	0.0550	0.0016	0.29	0.0571	0.0026	365	15	345	10	494	100	349	9	6.73	0.009
#36	0.4120	0.0152	0.0532	0.0024	0.60	0.0562	0.0024	350	11	334	15	460	95	347	11	7.67	0.006
#37	0.3922	0.0445	0.0563	0.0026	0.20	0.0505	0.0037	336	32	353	16	220	167	351	15	1.07	0.302
#38	0.4063	0.0233	0.0537	0.0019	0.31	0.0549	0.0027	346	17	337	12	409	110	339	11	1.13	0.287
#39	0.3809	0.0213	0.0529	0.0021	0.36	0.0522	0.0020	328	16	332	13	294	89	331	12	0.34	0.557
#40	0.3947	0.0352	0.0553	0.0025	0.25	0.0517	0.0031	338	26	347	15	274	139	345	14	0.50	0.478
#41	0.3928	0.0467	0.0594	0.0029	0.20	0.0480	0.0048	336	34	372	17	98	235	366	17	4.20	0.041
#42	0.3934	0.0283	0.0532	0.0026	0.34	0.0536	0.0026	337	21	334	16	355	109	335	14	0.06	0.810
#43	0.3891	0.0202	0.0522	0.0019	0.35	0.0541	0.0017	334	15	328	12	374	69	330	11	0.56	0.454
#44	0.4577	0.0335	0.0570	0.0036	0.43	0.0583	0.0033	383	23	357	22	541	123	368	19	4.47	0.035
#45	0.4300	0.0185	0.0575	0.0021	0.43	0.0543	0.0017	363	13	360	13	382	70	362	11	0.18	0.673
#46	0.3952	0.0211	0.0529	0.0017	0.31	0.0542	0.0021	338	15	332	11	380	87	334	10	0.57	0.448
#47	0.3912	0.0150	0.0533	0.0016	0.39	0.0532	0.0018	335	11	335	10	338	75	335	9	0.00	0.951
#48	0.3912	0.0214	0.0517	0.0027	0.47	0.0549	0.0022	335	16	325	16	408	88	331	14	1.60	0.205
#49	0.4036	0.0189	0.0536	0.0018	0.35	0.0546	0.0022	344	14	337	11	394	90	339	10	1.08	0.298
#50	0.3922	0.0320	0.0551	0.0020	0.22	0.0516	0.0026	336	23	346	12	270	115	344	12	0.66	0.416
